# Supplementary material
Source: publisher figshare collection journal article supplement (https://frontiersin.figshare.com/ndownloader/files/12727856)
Supplement: Supplementary file [file 12727856]

## Supplementary Material

### Communicating intent of automated vehicles to pedestrians

Azra Habibovic\*, Victor Malmsten Lundgren, Jonas Andersson, Maria Klingegård, Tobias Lagström, Anna Sirkka, Johan Fagerlönn, Claes Edgren, Rikard Fredriksson, Stas Krupenia, Dennis Saluäär, Pontus Larsson

\* Correspondence: Azra Habibovic, [azra.habibovic@ri.se](mailto:azra.habibovic@ri.se)

#### 1 Supplementary Tables

Supplementary Table 1. Procedure in the *Experiment I*.

| Phase                                                                   | Encounter # | AVIP signal(s)                                                                                                                                                   | Narrative                                                                                                                                                                                                                                                                                                                                                                                                                                                                                                                                                                                                                                                                                                                                                                                                                                                                                                                                                                                                                                                                                                                                                                                                                      |
|-------------------------------------------------------------------------|-------------|------------------------------------------------------------------------------------------------------------------------------------------------------------------|--------------------------------------------------------------------------------------------------------------------------------------------------------------------------------------------------------------------------------------------------------------------------------------------------------------------------------------------------------------------------------------------------------------------------------------------------------------------------------------------------------------------------------------------------------------------------------------------------------------------------------------------------------------------------------------------------------------------------------------------------------------------------------------------------------------------------------------------------------------------------------------------------------------------------------------------------------------------------------------------------------------------------------------------------------------------------------------------------------------------------------------------------------------------------------------------------------------------------------|
| F<br>A<br>M<br>I<br>L<br>I<br>A<br>R<br>I<br>Z<br>A<br>T<br>I<br>O<br>N | 1           | <i>I'm in automated mode</i><br>-> <i>I'm about to yield</i><br>-> <i>I'm waiting</i><br>-> <i>I'm about to start driving</i><br>-> <i>I'm in automated mode</i> | <ul style="list-style-type: none"> <li>Vehicle accelerates from a ca 85 distance while pedestrian is turned with his/her back towards the roadway. The (fake) driver is reading newspaper. The <i>I'm in automated mode</i> signal is activated.</li> <li>Pedestrian turns towards the roadway and starts observing the vehicle (12 km/h) when it is ca 50 m from him/her.</li> <li>At ca 45 m distance, <i>I'm about to yield</i> signal is activated.</li> <li>At ca 20 m distance, the vehicle starts decelerating.</li> <li>The vehicle stops at ca 5 m distance and <i>I'm waiting</i> signal is activated.</li> <li>After ca 30 seconds, the <i>I'm about to start driving</i> signal is activated.</li> <li>The <i>I'm in automated mode</i> signal is activated and the vehicle starts accelerating.</li> <li>Pedestrian turns his/her back towards the roadway and answers the following questions: <ul style="list-style-type: none"> <li><i>Describe what you saw?</i></li> <li><i>How did you experience the traffic situation?</i></li> <li><i>How did you experience the light signals in the windshield?</i></li> <li><i>What function did the light signals in the windshield have?</i></li> </ul> </li> </ul> |
|                                                                         | 2           | Same as Encounter #1                                                                                                                                             | Same as Encounter #1, but different questions: <ul style="list-style-type: none"> <li><i>Do you have any questions about the system?</i></li> <li><i>Have you understood how the system works?</i></li> <li><i>Do you have any comments about interacting with a self-driving car and its attempt to communicate with you?</i></li> </ul>                                                                                                                                                                                                                                                                                                                                                                                                                                                                                                                                                                                                                                                                                                                                                                                                                                                                                      |
| U<br>N<br>D<br>E<br>R<br>S<br>T<br>A<br>N<br>D<br>A<br>B<br>L<br>Y      | 3           | <i>I'm in automated mode</i><br>-> <i>I'm about to yield</i>                                                                                                     | <ul style="list-style-type: none"> <li>Vehicle accelerates from a ca 85 distance while pedestrian is turned with his/her back towards the roadway. The (fake) driver is reading newspaper. The <i>I'm in automated mode</i> signal is activated.</li> <li>Pedestrian turns towards the roadway and starts observing the vehicle (12 km/h) when it is ca 50 m from him/her.</li> <li>At ca 45 m distance, <i>I'm about to yield</i> signal is activated.</li> <li>Pedestrian turns his/her back towards the roadway and answers the following questions: <ul style="list-style-type: none"> <li><i>What signal did the car show?</i></li> <li><i>How confident are you on your answer on a scale from 1 to 5 where 1 is uncertain and 5 is very certain?</i></li> </ul> </li> </ul>                                                                                                                                                                                                                                                                                                                                                                                                                                             |
|                                                                         | 4           | <i>I'm waiting</i><br>-> <i>I'm about to start driving</i><br>-> <i>I'm in automated mode</i>                                                                    | <ul style="list-style-type: none"> <li>The vehicle stops at ca 5 m distance and <i>I'm waiting</i> signal is activated.</li> <li>After ca 30 seconds, the <i>I'm about to start driving</i> is activated.</li> <li>The <i>I'm in automated mode</i> signal is activated and the vehicle starts accelerating.</li> <li>Pedestrian turns his/her back towards the roadway and answers the questions (same as in Encounter #3).</li> </ul>                                                                                                                                                                                                                                                                                                                                                                                                                                                                                                                                                                                                                                                                                                                                                                                        |
|                                                                         | 5           | Same as Encounter #3                                                                                                                                             | Same as Encounter #3                                                                                                                                                                                                                                                                                                                                                                                                                                                                                                                                                                                                                                                                                                                                                                                                                                                                                                                                                                                                                                                                                                                                                                                                           |
|                                                                         | 6           | Same as Encounter #4                                                                                                                                             | Same as Encounter #4                                                                                                                                                                                                                                                                                                                                                                                                                                                                                                                                                                                                                                                                                                                                                                                                                                                                                                                                                                                                                                                                                                                                                                                                           |
|                                                                         | 7           | Same as Encounter #1                                                                                                                                             | Same as Encounter #1                                                                                                                                                                                                                                                                                                                                                                                                                                                                                                                                                                                                                                                                                                                                                                                                                                                                                                                                                                                                                                                                                                                                                                                                           |
| COMPARISON                                                              | 8           | Automated driving, no AVIP                                                                                                                                       | Same as Encounter #1 (but without AVIP signals active)                                                                                                                                                                                                                                                                                                                                                                                                                                                                                                                                                                                                                                                                                                                                                                                                                                                                                                                                                                                                                                                                                                                                                                         |
